# Supplementary material for: Gut microbiota and fecal short chain fatty acids differ with adiposity and country of origin: The METS-Microbiome Study
Source: PubMed Central journal article supplement — bioRxiv. 2023 Mar 22:2023.03.21.533195. Preprint. [Version 1] doi: 10.1101/2023.03.21.533195 (PMC10055249; doi:10.1101/2023.03.21.533195), 2023-03-22

**Supplementary Files**

**Supplementary table 1. Alpha diversity between obese and non-obese groups. Alpha diversity estimated by Shannon, Observed ASVs and Faith's PD (Phylogenetic Diversity) between obese and non-obese in each country. Asterisks indicate statistical significance \* $p < 0.05$  (FDR-corrected). FDR= False Discovery Rate**

| Country      | Observed ASVs | Shannon | Faith's PD |
|--------------|---------------|---------|------------|
|              | P             | P       | P          |
| Ghana        | 0.0439 *      | 0.268   | 0.0393 *   |
| Jamaica      | 0.338         | 0.494   | 0.239      |
| South Africa | 0.0488 *      | 0.0686  | 0.12       |
| Seychelles   | 0.206         | 0.752   | 0.186      |
| US           | 0.759         | 0.246   | 0.901      |

**Supplementary table 2. Gut microbiota (Weighted UniFrac Distance). Adjusted multivariable analysis in the entire cohort (overall) and by each country. Statistical significance from permutational multivariate analysis of variance (PERMANOVA) test,  $p < 0.05$ . All  $p$ -values are generated based on 999 permutations**

|                | Overall        |       | Ghana          |       | South Africa   |       | Jamaica        |       | Seychelles     |       | US             |       |
|----------------|----------------|-------|----------------|-------|----------------|-------|----------------|-------|----------------|-------|----------------|-------|
|                | R <sup>2</sup> | P     | R <sup>2</sup> | P     | R <sup>2</sup> | P     | R <sup>2</sup> | P     | R <sup>2</sup> | P     | R <sup>2</sup> | P     |
| <b>Obese</b>   | 0.001          | 0.031 | 0.004          | 0.208 | 0.003          | 0.415 | 0.002          | 0.732 | 0.001          | 0.903 | 0.007          | 0.043 |
| <b>Sex</b>     | 0.003          | 0.001 | 0.002          | 0.549 | 0.004          | 0.19  | 0.009          | 0.009 | 0.023          | 0.001 | 0.011          | 0.004 |
| <b>Age</b>     | 0.002          | 0.001 | 0.101          | 0.815 | 0.08           | 0.737 | 0.102          | 0.062 | 0.053          | 0.894 | 0.098          | 0.283 |
| <b>Country</b> | 0.118          | 0.001 |                |       |                |       |                |       |                |       |                |       |

**Supplementary table 3 – Description of study participants by microbial endotypes. Data are presented as median (interquartile range) for continuous variables, percentages (%) for categorical data. Statistical significance,  $p < 0.05$ . BMI = Body Mass Index, SCFA = short chain fatty acids**

|                    | <b>Bacteroides type</b> | <b>Prevotella type</b> | <b>p-value</b> | <b>q-value</b> |
|--------------------|-------------------------|------------------------|----------------|----------------|
| <b>N</b>           | 820                     | 866                    |                |                |
| <b>BMI</b>         | 29(25,35)               | 28(23,34)              | 0.003          | 0.004          |
| <b>Country</b>     |                         |                        | <0.001         | <0.001         |
| Ghana              | 61 (7.4%)               | 265(31%)               |                |                |
| Jamaica            | 243(30%)                | 117(14%)               |                |                |
| Seychelles         | 149(18%)                | 176(20%)               |                |                |
| South Africa       | 142(17%)                | 232(27%)               |                |                |
| US                 | 225(27%)                | 76(8.8%)               |                |                |
| <b>Sex</b>         | 564(69%)                | 503(58%)               | <0.001         | <0.001         |
| <b>Age</b>         | 44(38,50)               | 42(36,48)              | 0.032          | 0.032          |
| <b>Obese</b>       | 370(45%)                | 346(40%)               | <0.001         | <0.001         |
| <b>Total SCFA</b>  | 3547(2325,4891)         | 5300(3591,7672)        | <0.001         | <0.001         |
| <b>Bacteroides</b> | 1299(315,7521)          | 92(18,526)             | <0.001         | <0.001         |
| <b>Prevotella</b>  | 98(25,319)              | 1246(198,10382)        | <0.001         | <0.001         |

Median(IQR), n (%)

p-value: Wilcoxon rank run test, Pearson's Chi-squared test

q-value: False discovery rate correction multiple testing

**Supplementary table 4. Weight adjusted fecal SCFA levels by country**

| <b>WOMEN</b>      |              |                     |                |                   |              |
|-------------------|--------------|---------------------|----------------|-------------------|--------------|
|                   | <b>Ghana</b> | <b>South Africa</b> | <b>Jamaica</b> | <b>Seychelles</b> | <b>US</b>    |
|                   | <b>n=254</b> | <b>n=228</b>        | <b>n=263</b>   | <b>n=196</b>      | <b>n=213</b> |
| Propionate (ug/g) | 30.4 ± 18.0  | 11.6 ± 6.9          | 11.5 ± 8.5     | 14.5 ± 8.5        | 9.1 ± 6.0    |
| Butyrate (ug/g)   | 22.1 ± 11.8  | 10.6 ± 6.6          | 8.5 ± 6.8      | 7.0 ± 5.4         | 9.0 ± 6.5    |
| Acetate (ug/g)    | 61.3 ± 22.8  | 15.6 ± 7.4          | 24.4 ± 13.3    | 40.9 ± 25.4       | 16.8 ± 11.1  |
| Total SCFA (ug/g) | 115.5 ± 45.0 | 39.5 ± 19.0         | 46.0 ± 26.3    | 63.8 ± 35.1       | 36.4 ± 21.5  |
| <b>MEN</b>        |              |                     |                |                   |              |
|                   | <b>Ghana</b> | <b>South Africa</b> | <b>Jamaica</b> | <b>Seychelles</b> | <b>US</b>    |
|                   | <b>n=117</b> | <b>n=171</b>        | <b>n=133</b>   | <b>n=164</b>      | <b>n=107</b> |
| Propionate (ug/g) | 34.3 ± 15.9  | 18.6 ± 13.1         | 18.3 ± 13.2    | 21.0 ± 13.9       | 13.1 ± 9.9   |
| Butyrate (ug/g)   | 23.1 ± 14.2  | 14.5 ± 9.0          | 13.2 ± 10.1    | 8.6 ± 4.7         | 11.3 ± 6.8   |
| Acetate (ug/g)    | 68.9 ± 22.5  | 22.1 ± 9.3          | 27.0 ± 13.3    | 42.2 ± 17.2       | 22.3 ± 13.7  |
| Total SCFA (ug/g) | 128.0 ± 44.2 | 57.3 ± 27.9         | 60.3 ± 30.1    | 72.8 ± 32.0       | 48.4 ± 27.3  |

**Supplementary table 5. Total fecal SCFA by adiposity status; non-obese vs. obese**

| <b>NON-OBESE</b>         |              |                     |                |                   |              |
|--------------------------|--------------|---------------------|----------------|-------------------|--------------|
|                          | <b>Ghana</b> | <b>South Africa</b> | <b>Jamaica</b> | <b>Seychelles</b> | <b>US</b>    |
|                          | <b>n=254</b> | <b>n=228</b>        | <b>n=263</b>   | <b>n=196</b>      | <b>n=213</b> |
| <b>Propionate (ug/g)</b> | 34.1 ± 18.3  | 16.8 ± 11.8         | 16.6 ± 13.0    | 19.2 ± 13.2       | 12.7 ± 9.6   |
| <b>Butyrate (ug/g)</b>   | 23.8 ± 13.2  | 14.3 ± 8.6          | 12.2 ± 9.7     | 8.4 ± 5.9         | 11.1 ± 7.4   |
| <b>Acetate (ug/g)</b>    | 69.3 ± 22.4  | 21.4 ± 9.2          | 28.3 ± 15.3    | 45.9 ± 24.1       | 23.1 ± 14.2  |
| <b>Total scfa (ug/g)</b> | 129.1 ± 45.0 | 54.6 ± 26.3         | 59.0 ± 32.6    | 74.8 ± 37.6       | 48.9 ± 28.4  |
| <b>OBESE</b>             |              |                     |                |                   |              |
|                          | <b>Ghana</b> | <b>South Africa</b> | <b>Jamaica</b> | <b>Seychelles</b> | <b>US</b>    |
|                          | <b>n=89</b>  | <b>n=141</b>        | <b>n=178</b>   | <b>n=132</b>      | <b>n=201</b> |
| <b>Propionate (ug/g)</b> | 24.9 ± 12.4  | 10.7 ± 6.3          | 10.3 ± 5.9     | 14.6 ± 8.1        | 9.1 ± 6.1    |
| <b>Butyrate (ug/g)</b>   | 18.7 ± 10.2  | 8.7 ± 5.0           | 7.7 ± 5.6      | 6.6 ± 3.3         | 9.0 ± 6.1    |
| <b>Acetate (ug/g)</b>    | 48.7 ± 16.9  | 13.2 ± 4.9          | 21.6 ± 9.5     | 34.9 ± 16.8       | 16.0 ± 10.1  |
| <b>Total scfa (ug/g)</b> | 93.9 ± 33.9  | 34.1 ± 14.5         | 40.9 ± 18.0    | 57.1 ± 24.0       | 35.4 ± 19.9  |

**Supplementary figure 1.** Differentially abundant taxa among countries (A-D) and obese group (E) adjusted for BMI, age, sex and country using ANCOM-BC. Bars represent ANCOM-BC estimated log fold change between compared groups (effect size) and error bars, with the 95% confidence interval. ANCOM-BC data for country, representative ASVs with log fold change >1.4 in at least one group are shown. FDR-adjusted ( $p < 0.05$ ) effect sizes are indicated by \*, \*\* and \*\*\*, corresponding to  $p < 0.05$ ,  $< 0.01$  and  $< 0.001$  respectively. FDR= False Discovery Rate

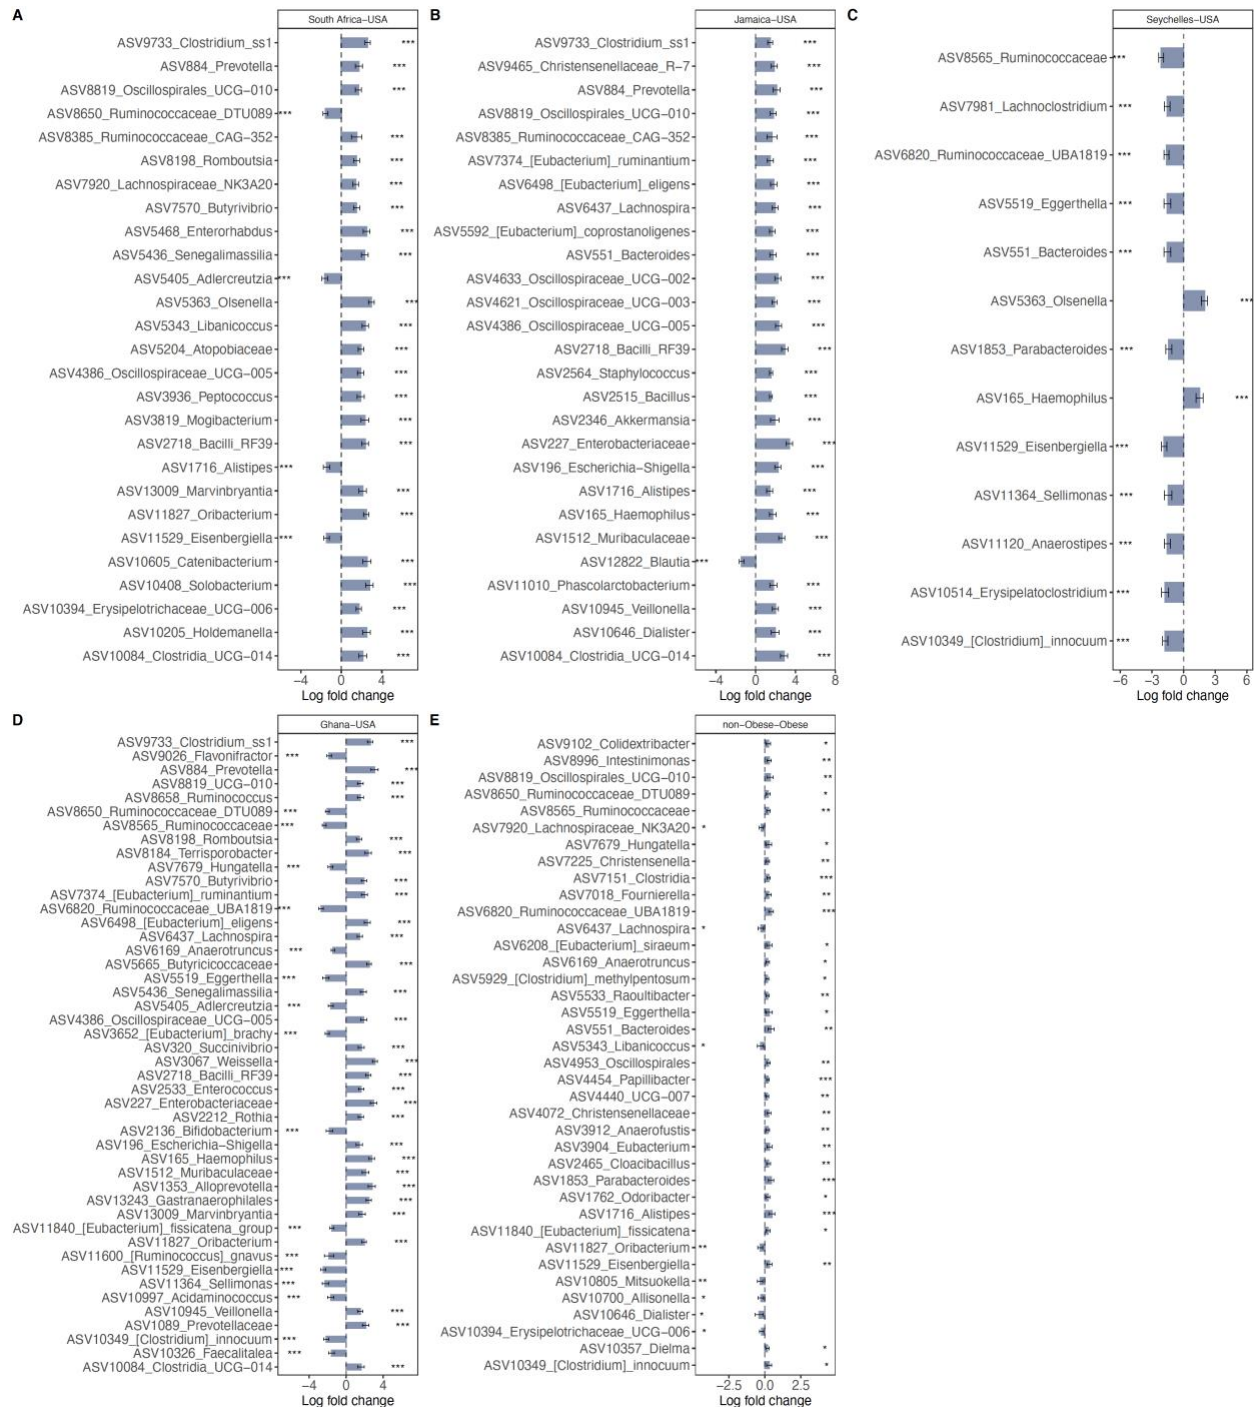

**Supplementary figure 2.** Heatmap representations of the 30 most predictive microbial features (in rows) identified by Random Forest analysis for classification of samples into the various countries (A) and into obese and non-obese groups (B).

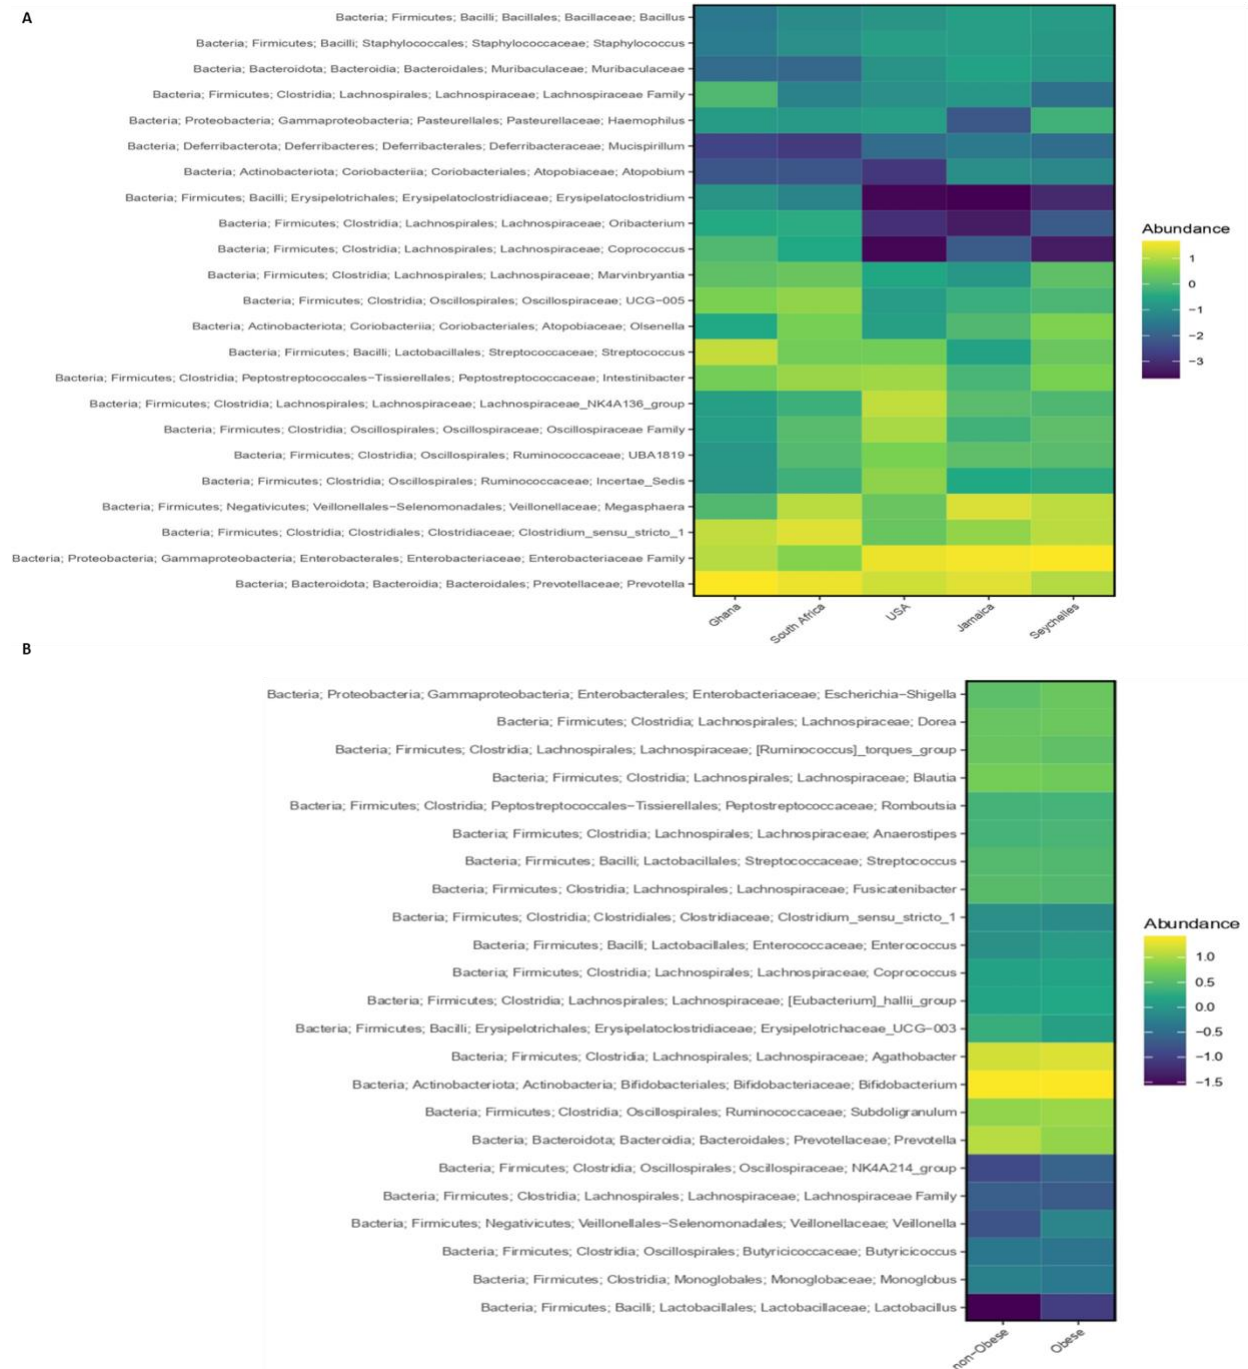

**Supplementary figure 3.** Receiver operating characteristic curves showing the classification accuracy of gut microbiota in a Random Forest model. Classification accuracy for estimating obesity status in **(A)**. Ghana; **(B)** South Africa, **(C)**. Jamaica; **(D)**. Seychelles; **(E)**. US are presented. AUC= area under the curve

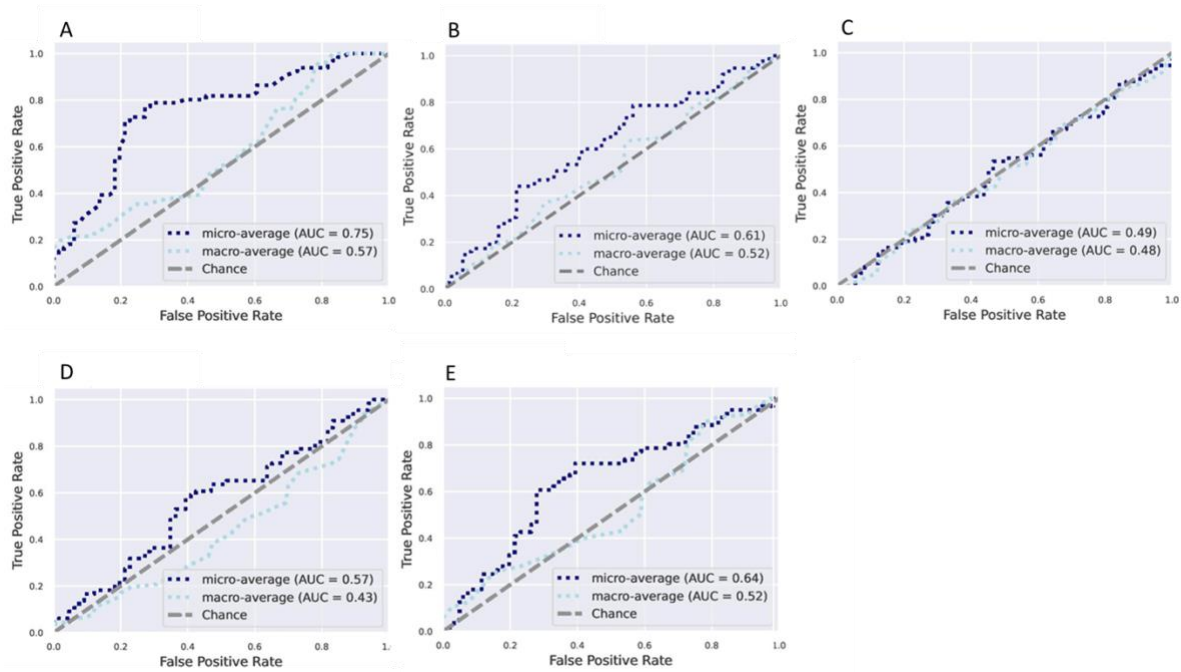

**Supplementary figure 4.** Differentially abundant predicted PICRUST2 MetaCyc pathways among countries (A) and obese group (B) adjusted for BMI, age, sex and country using ANCOM-BC. Bars represent the ANCOM-BC estimated log fold change between compared groups (effect size) and error bars, with the 95% confidence interval. ANCOM-BC data for country, representative predicted pathways with log fold change >1.4 in at least one group are shown. FDR-adjusted ( $p < 0.05$ ) effect sizes are indicated by \*, \*\* and \*\*\*, corresponding to  $p < 0.05$ ,  $< 0.01$  and  $< 0.001$  respectively. FDR= False Discovery Rate

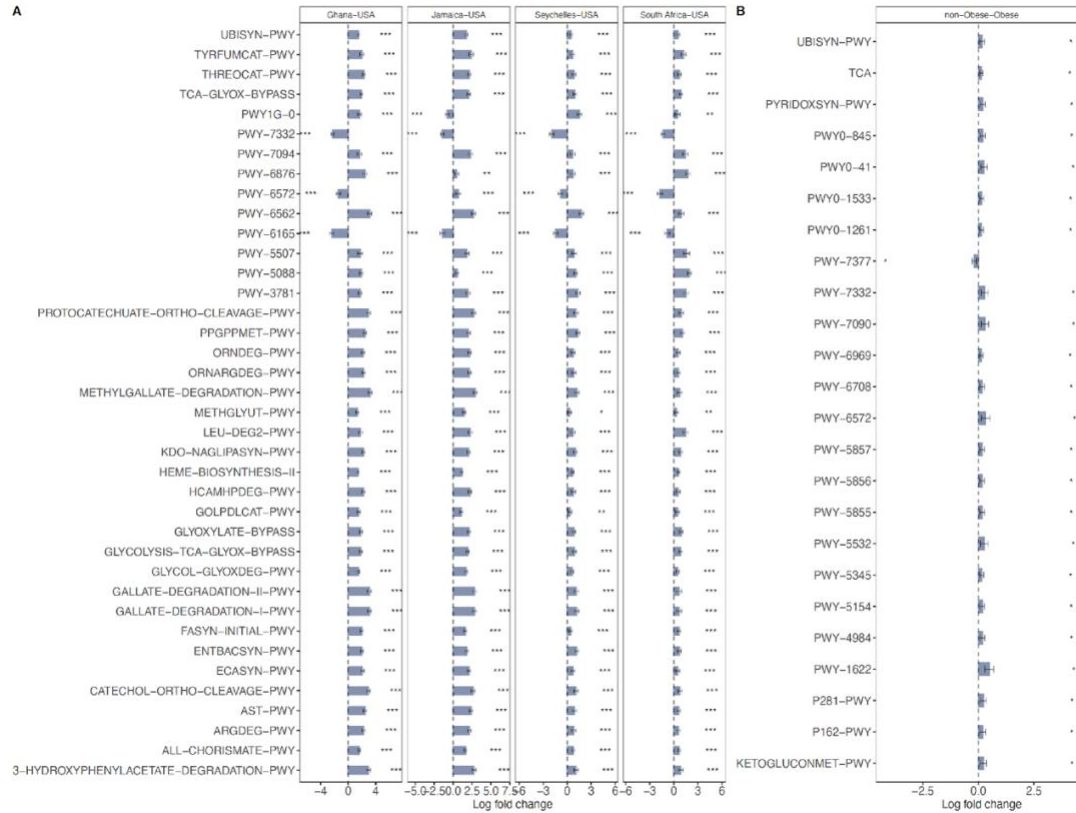



**Supplementary figure 5.** Differentially abundant predicted PICRUST2 KEGG orthology (KO) in butanoate metabolism pathway among countries (A) and obese group (B) adjusted for BMI, age, sex and country using ANCOM-BC. Bars represent the ANCOM-BC estimated log fold change between compared groups (effect size) and error bars, with the 95% confidence interval. ANCOM-BC data for country, representative predicted pathways with log fold change >1.4 in at least one group are shown. FDR-adjusted ( $p < 0.05$ ) effect sizes are indicated by \*, \*\* and \*\*\*, corresponding to  $p < 0.05$ ,  $<0.01$  and  $<0.001$  respectively. FDR= False Discovery Rate

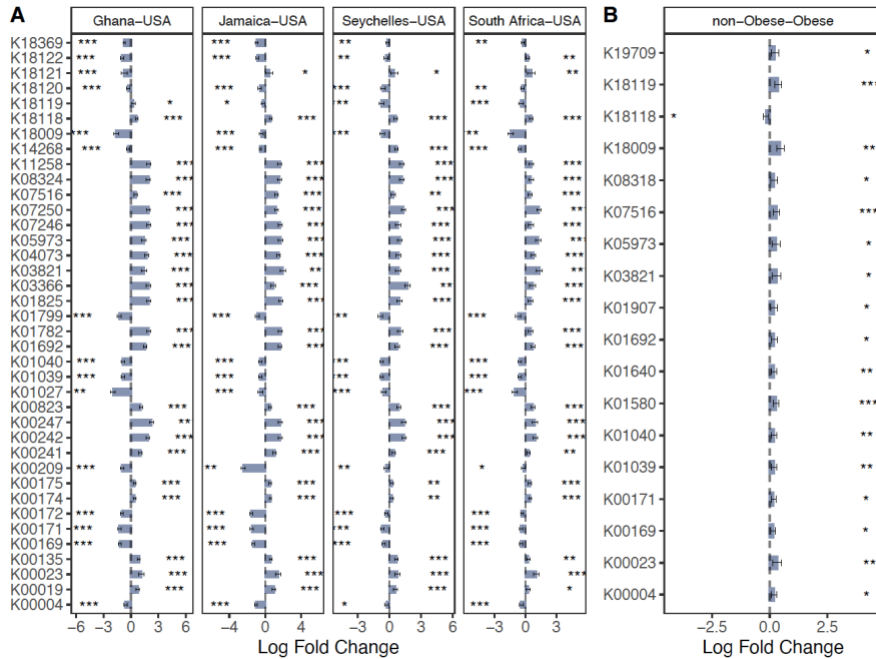

**Supplementary figure 6.** Differentially abundant predicted PICRUST2 KEGG orthology (KO) in LPS biosynthesis pathway among countries (A) and obese group (B) adjusted for BMI, age, sex and country using ANCOM-BC. Bars represent the ANCOM-BC estimated log fold change between compared groups (effect size) and error bars, with the 95% confidence interval. ANCOM-BC data for country, representative predicted pathways with log fold change >1.4 in at least one group are shown. FDR-adjusted ( $p < 0.05$ ) effect sizes are indicated by \*, \*\* and \*\*\*, corresponding to  $p < 0.05$ ,  $<0.01$  and  $<0.001$  respectively. FDR= False Discovery Rate

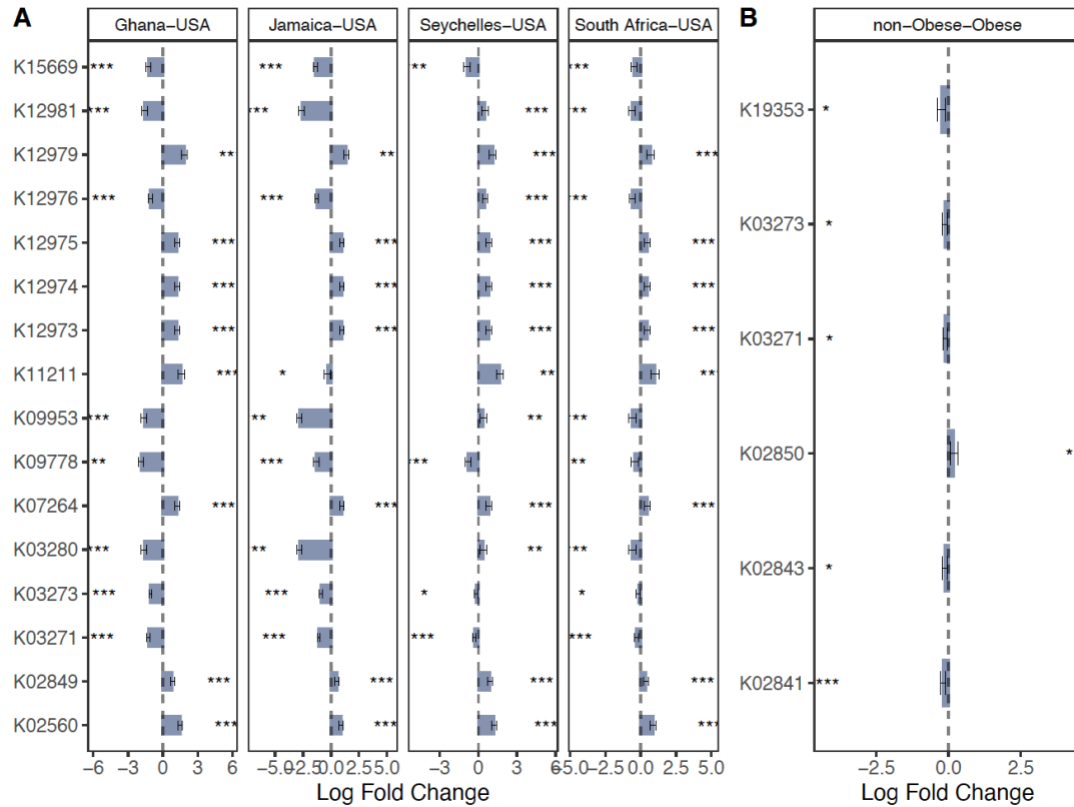

Supplement: media-1.pdf [file media-1.pdf]
